# Supplementary material
Source: PubMed Central journal article supplement (PMC1794291)
Supplement: pnas_0608099104_12.pdf [file pnas_0608099104_12.pdf]

TABLE S-I List of the 10 inter-atomic distances for the atoms belonging to the central alanine residue.

| distance-name | interacting-atoms |
|---------------|-------------------|
| d1            | N : $C_\beta$     |
| d2            | N : C             |
| d3            | N : O             |
| d4            | H : $C_\alpha$    |
| d5            | H : $C_\beta$     |
| d6            | H : C             |
| d7            | H : O             |
| d8            | $C_\alpha$ : O    |
| d9            | $C_\beta$ : C     |
| d10           | $C_\beta$ : O     |
