# Supplementary material
Source: PubMed Central journal article supplement (PMC1794291)

MCL

Potts

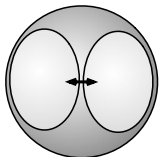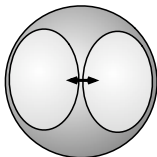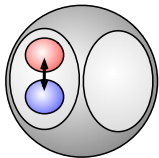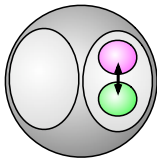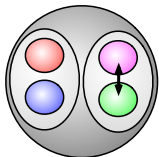

$\approx$

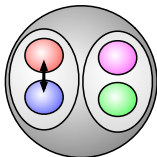

$p$

$\gamma$

  $C_{7eq}$

  $\alpha_R$

  $\alpha_L$

  $C_{7ax}$

Supplement: pnas_0608099104_10.pdf [file pnas_0608099104_10.pdf]

**(A)****20X20 cells**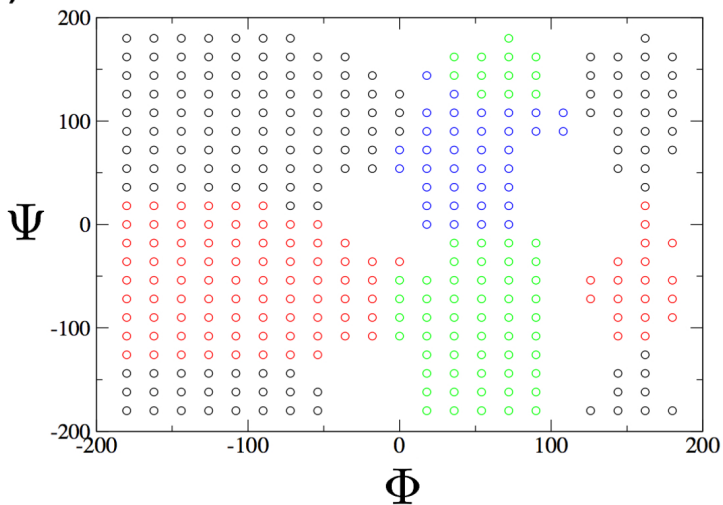**(B)****interatomic distances**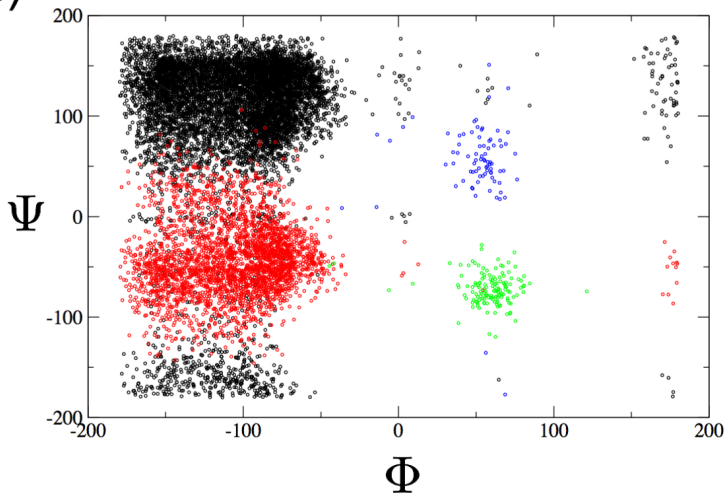

Supplement: pnas_0608099104_11.pdf [file pnas_0608099104_11.pdf]

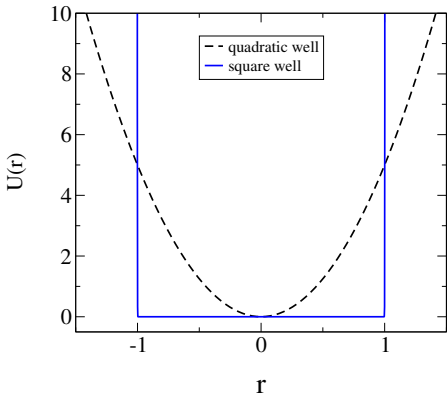

Supplement: pnas_0608099104_2.pdf [file pnas_0608099104_2.pdf]

(A)

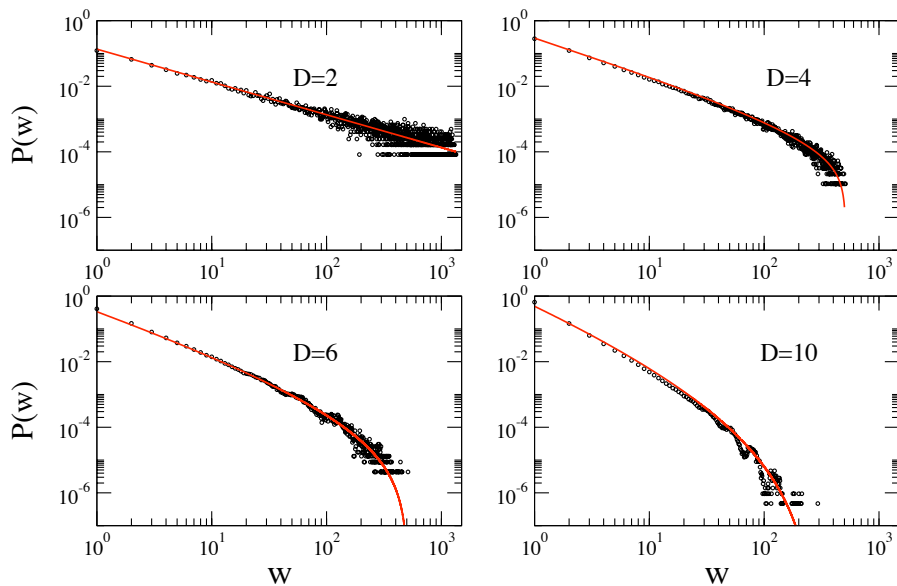

(B)

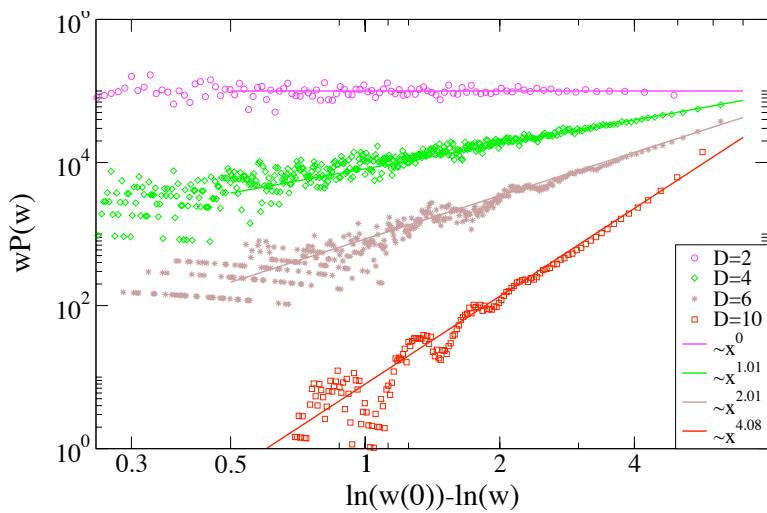

Supplement: pnas_0608099104_3.pdf [file pnas_0608099104_3.pdf]

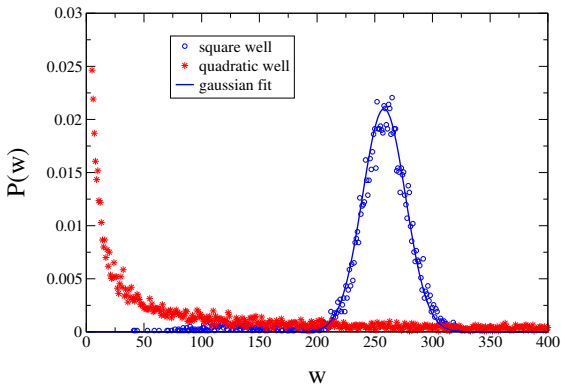

Supplement: pnas_0608099104_4.pdf [file pnas_0608099104_4.pdf]

(A)

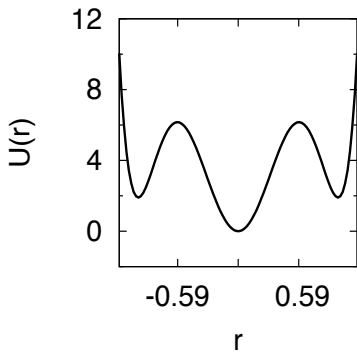

(B)

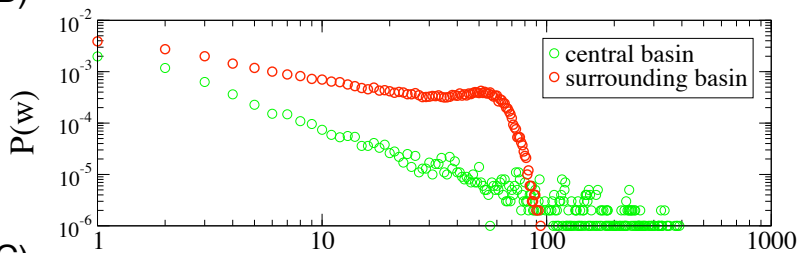

(C)

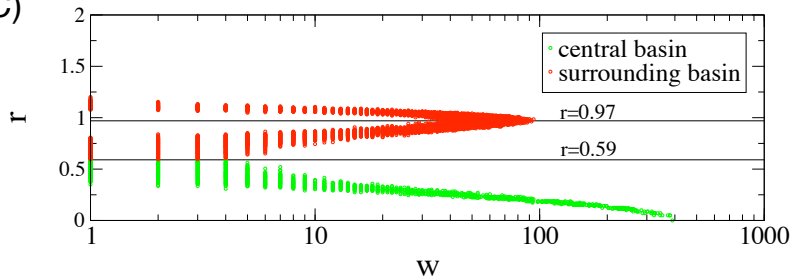

Supplement: pnas_0608099104_5.pdf [file pnas_0608099104_5.pdf]

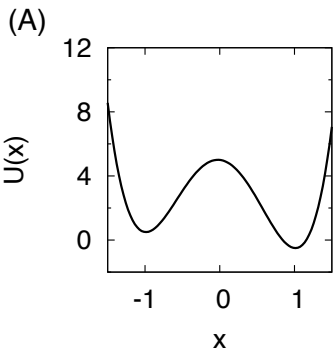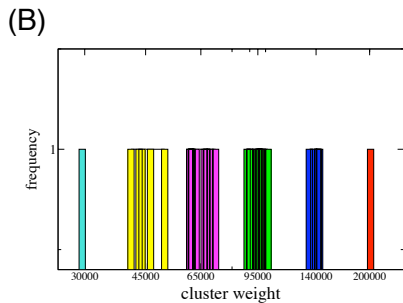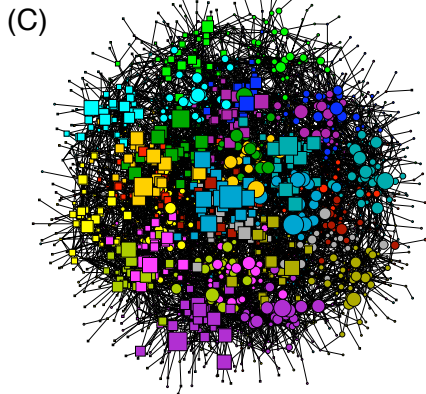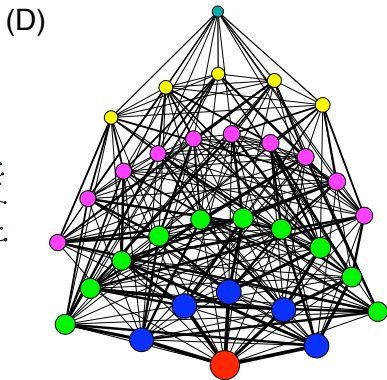

Supplement: pnas_0608099104_6.pdf [file pnas_0608099104_6.pdf]

(A)

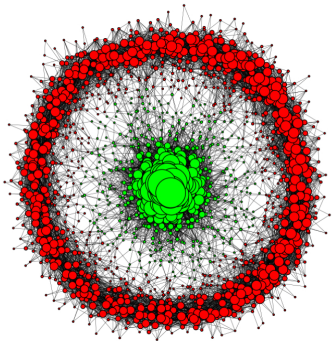

(B)

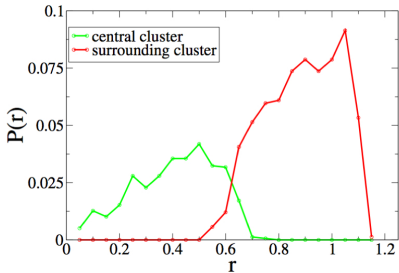

Supplement: pnas_0608099104_7.pdf [file pnas_0608099104_7.pdf]

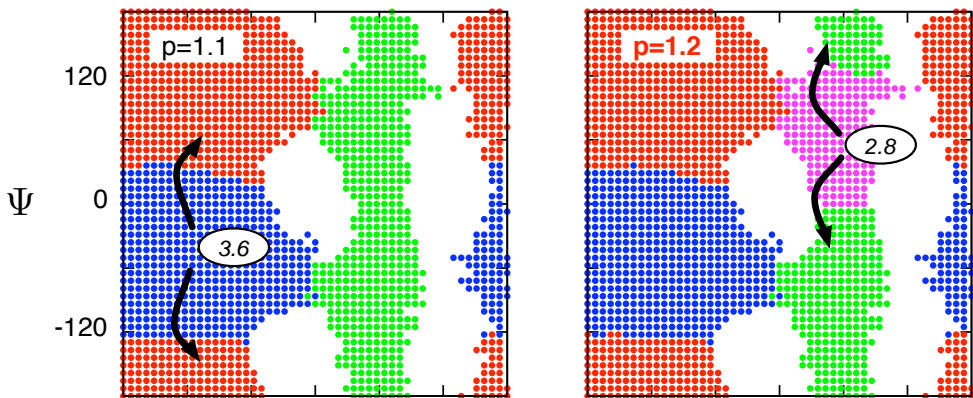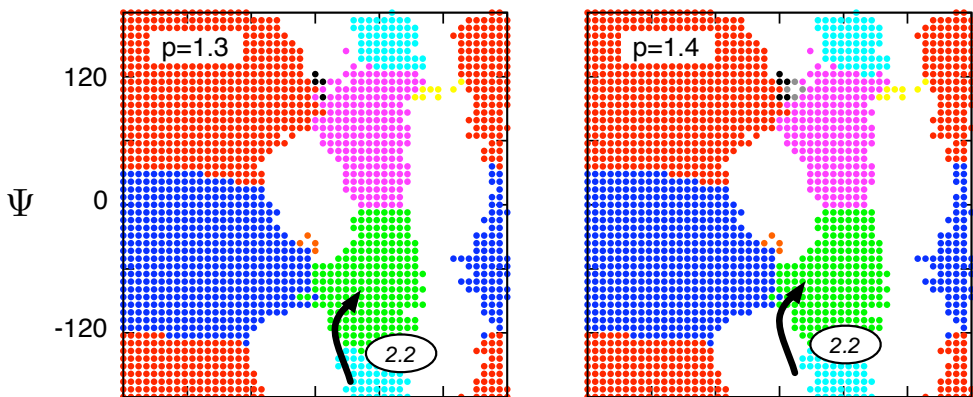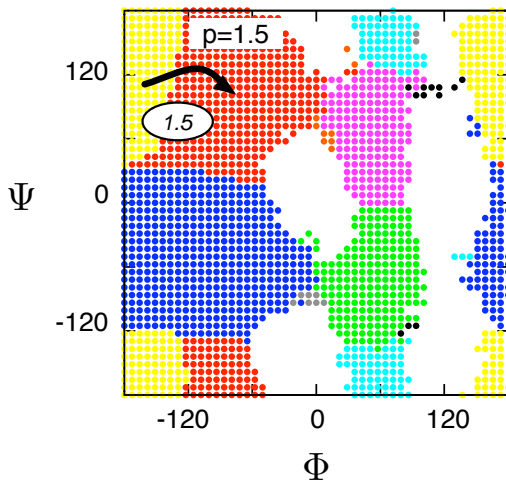

Supplement: pnas_0608099104_8.pdf [file pnas_0608099104_8.pdf]

# Modularity optimization

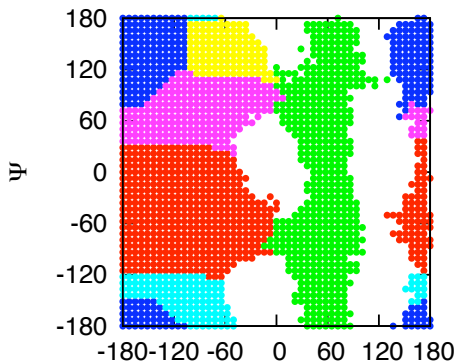

# Potts Hamiltonian

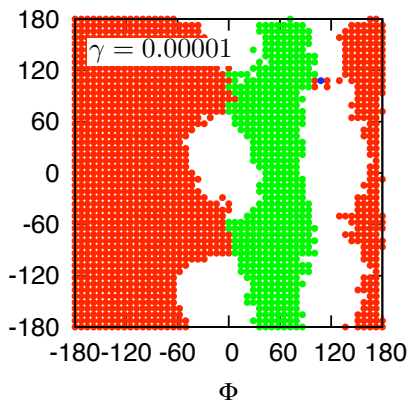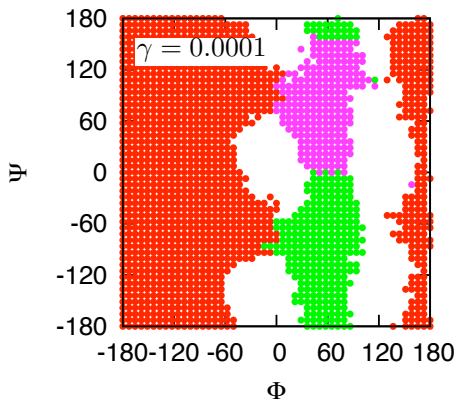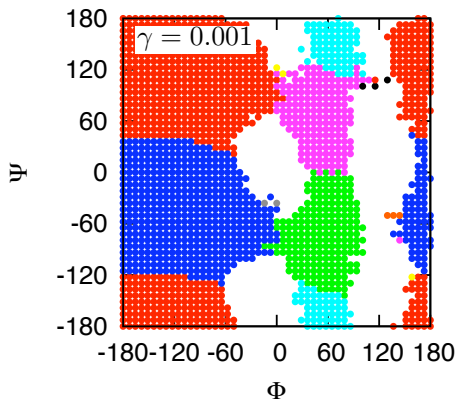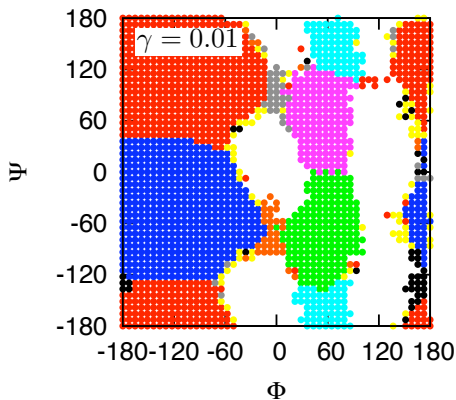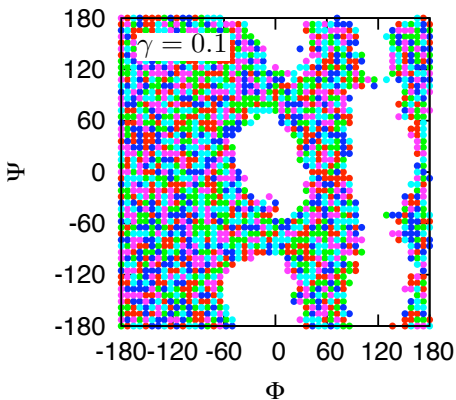

Supplement: pnas_0608099104_9.pdf [file pnas_0608099104_9.pdf]
